# Supplementary material for: Karyotype and DNA-Methylation Responses in Myelodysplastic Syndromes following Treatment with Traditional Chinese Formula Containing Arsenic
Source: Hindawi journal article supplement (doi:10.1155/2012/969476), 2012-01-01
Supplement: f1 [file 969476.f1.pdf]

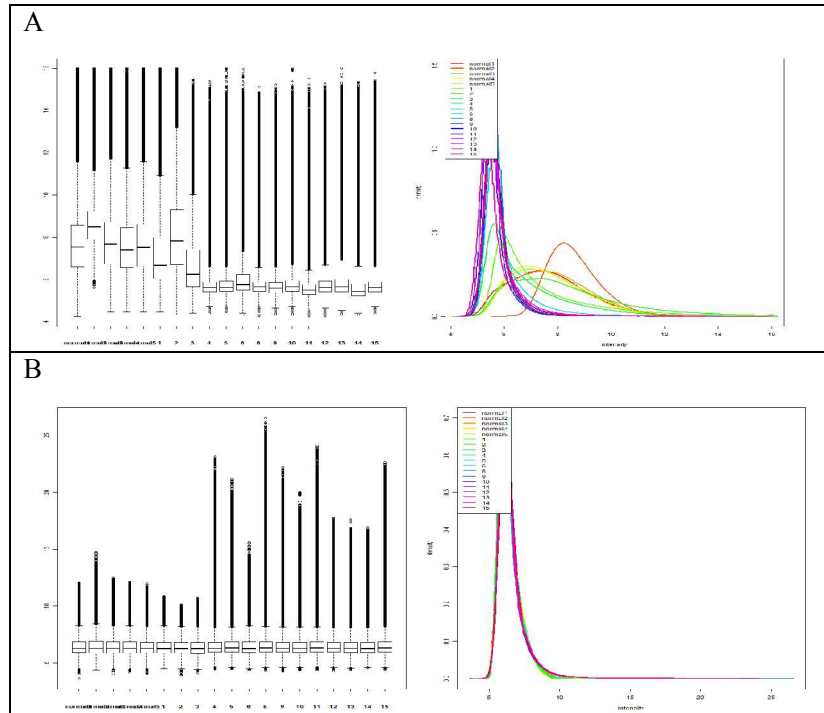

Supplement Fig 1 Initial standardization of gene Chips. A) Status before standardization; B) Status after standardization;

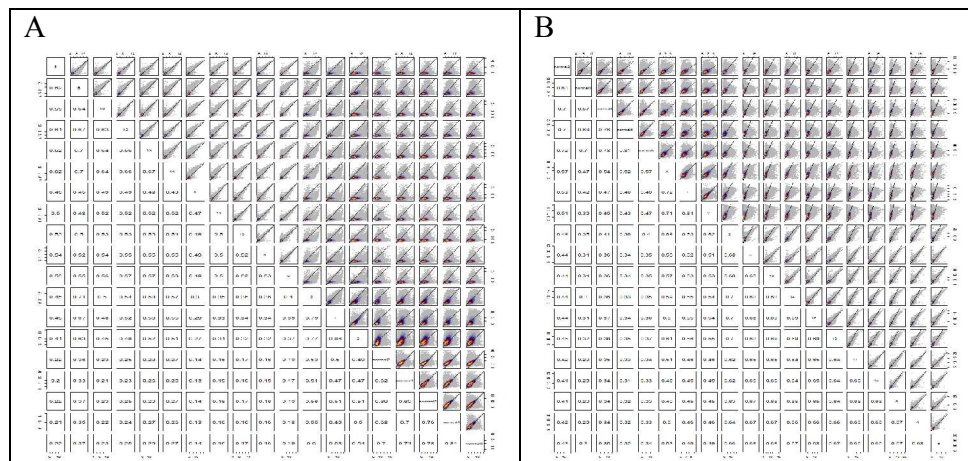

Supplement Fig 2. Correlation of each pair of gene chips before standardization (A) and after standardization (B). Scattered dots on top right corner represent signals from each pair of chips; Numbers in bottom left corner are correlation-ratio of each pair chips.
